# Supplementary material for: Normative Data for a Rapid, Automated Test of Spatial Release From Masking
Source: Am J Audiol. 2018 Dec 6;27(4):529–38. doi: 10.1044/2018_AJA-17-0069 (PMC6436452; doi:10.1044/2018_AJA-17-0069)
Supplement: Supplemental Material S1. [file AJA-27-529-s001.xlsx]

## Sheet: Supplemental Data Set
Online supplemental material, Jaken & Gallun, "Normative Data for a Rapid, Automated Test of Spatial Release From Masking," AJA, https://doi.org/10.1044/2018_AJA-17-0069	Supplementary Data Set ID Number	PTA_St_B	Gender	HA User?	AgeAudio	R500AC	R1000AC	R2000AC	R4000AC	R8000AC	L500AC	L1000AC	L2000AC	L4000AC	L8000AC	PTA_St_B	PTA_Hf_B	MaxAsymm_2Kandbelow	MaxAsymm_allfreqs		SR2_0_run1	SR2_0_run2	SR2_0_runs1_2	SR2_45_run1	SR2_45_run2	SR2_45_runs1_2	SR2_SRM_run1	SR2_SRM_run2	SR2_SRM_runs1_2		SR2_0_diff	SR2_45_diff	SR2_SRM_diff		Difference (days)		SR2_0_run1_pred	SR2_0_run2_pred	SR2_0_runs1_2_pred	SR2_45_run1_pred	SR2_45_run2_pred	SR2_45_runs1_2_pred	SR2_SRM_run1_pred	SR2_SRM_run2_pred	SR2_SRM_runs1_2_pred		SR2_0_run1_error	SR2_0_run2_error	SR2_0_runs1_2_error
The full data set on which the correlations and multiple regression were based are shown here.	1	23.3333	Female	Yes	53	15	20	25	25	55	15	25	40	25	55	23.3333	37.5	15	15		4	5	4.5	10	4	7	-6	1	-2.5		1	-6	7		13		2.35134	1.77208	2.06171	-1.0172	-2.5813	-1.79925	3.36854	4.35338	3.86096		1.64866	3.22792	2.43829
Data dictionary is included on the next sheet.	2	11.6667	Female	No	70	10	10	15	25	55	5	20	10	30	55	11.6667	31.6667	10	10		4	1	2.5	9	-5	2	-5	6	0.5		-3	-14	11		574		3.1899	2.26923	2.72956	-2.09459	-3.8543	-2.97445	5.28449	6.12353	5.70401		0.8101	-1.26923	-0.22956
	3	7.5	Male	No	46	10	5	5	10	5	10	5	10	15	15	7.5	10	5	10		3	-1	1	-1	-3	-2	4	2	3		-4	-2	-2		738		2.41304	1.54563	1.97934	-4.21402	-5.60863	-4.91132	6.62706	7.15426	6.89066		0.58696	-2.54563	-0.97934
	4	12.5	Male	No	77	5	15	10	20	55	10	20	15	30	45	12.5	29.1667	5	10		5	3	4	3	1	2	2	2	2		-2	-2	0		310		3.42402	2.47987	2.95195	-1.54381	-3.40836	-2.47609	4.96783	5.88823	5.42803		1.57598	0.52013	1.04805
	5	4.1667	Male	No	24	5	5	5	5	-10	5	5	0	-5	0	4.1667	-0.83333	5	10		1	3	2	4	-9	-2.5	-3	12	4.5		2	-13	15		0		1.69134	0.88285	1.28709	-6.07107	-7.13309	-6.60208	7.7624	8.01595	7.88917		-0.69134	2.11715	0.71291
	6	30	Male	No	68	30	25	25	50	75	35	30	35	60	70	30	52.5	10	10		1	2	1.5	3	2	2.5	-2	0	-1		1	-1	2		6		2.75675	2.2286	2.49268	1.02407	-0.78572	0.11918	1.73268	3.01432	2.3735		-1.75675	-0.2286	-0.99268
	7	12.5	Male	No	60	10	15	15	25	40	10	15	10	55	50	12.5	32.5	5	30		2	1	1.5	-2	0	-1	4	1	2.5		-1	2	-3		8		2.81554	1.97043	2.39299	-2.52443	-4.14309	-3.33376	5.33997	6.11353	5.72675		-0.81554	-0.97043	-0.89299
	8	10	Female	No	65	10	10	5	10	20	10	10	15	20	35	10	17.5	10	15		4	1	2.5	0	-1	-0.5	4	2	3		-3	-1	-2		763		3.04381	2.11764	2.58072	-2.67702	-4.35723	-3.51712	5.72083	6.47486	6.09785		0.95619	-1.11764	-0.08072
	9	23.3333	Male	No	72	25	20	25	40	80	30	20	20	40	65	23.3333	45	5	15		2	-1	0.5	-4	4	0	6	-5	0.5		-3	8	-11		1004		3.0314	2.34145	2.68643	0.07879	-1.76013	-0.84067	2.95261	4.10157	3.52709		-1.0314	-3.34145	-2.18643
	10	3.3333	Female	No	25	0	0	10	0	5	5	0	5	10	10	3.3333	6.6667	5	10		4	5	4.5	2	-3	-0.5	2	8	5		1	-5	6		0		1.74356	0.91194	1.32775	-6.1604	-7.2333	-6.69685	7.90396	8.14524	8.0246		2.25644	4.08806	3.17225
	11	13.3333	Male	No	40	10	5	5	5	5	20	25	15	15	20	13.3333	10.8333	20	20		3	3	3	3	-3	0	0	6	3		0	-6	6		18		2.08324	1.37198	1.72761	-3.53112	-4.86408	-4.1976	5.61436	6.23605	5.92521		0.91676	1.62802	1.27239
	12	5.8333	Male	No	23	0	10	5	0	0	5	5	10	0	0	5.8333	2.5	5	5		-3	-2	-2.5	-7	-8	-7.5	4	6	5		1	-1	2		79		1.62267	0.85464	1.23866	-5.83476	-6.8895	-6.36213	7.45743	7.74415	7.60079		-4.62267	-2.85464	-3.73866
	13	27.5	Male	No	73	20	30	45	40	60	20	20	30	35	65	27.5	45.8333	15	15		3	2	2.5	4	0	2	-1	2	0.5		-1	-4	3		0		2.98502	2.3758	2.68041	0.87149	-0.99985	-0.06418	2.11354	3.37565	2.74459		0.01498	-0.3758	-0.18041
	14	2.5	Male	No	26	5	10	0	5	5	0	0	0	0	5	2.5	2.5	10	10		0	-1	-0.5	-5	-8	-6.5	5	7	6		-1	-3	2		609		1.79579	0.94103	1.36841	-6.24971	-7.33348	-6.79159	8.0455	8.27451	8.16001		-1.79579	-1.94103	-1.86841
	15	0.83333	Female	No	24	5	-10	5	0	0	10	0	-5	-5	-5	0.83333	-1.6667	10	10		1	2	1.5	-6	-4	-5	7	6	6.5		1	2	-1		0		1.75708	0.87934	1.31821	-6.65908	-7.70674	-7.18291	8.41615	8.58608	8.50112		-0.75708	1.12066	0.18179
	16	11.6667	Female	No	25	15	15	15	20	15	5	5	15	20	25	11.6667	18.3333	10	10		3	3	3	-1	-2	-1.5	4	5	4.5		0	-1	1		36		1.57922	0.92072	1.24997	-4.69037	-5.79918	-5.24477	6.26958	6.7199	6.49474		1.42078	2.07928	1.75003
	17	9.1667	Male	No	27	5	15	10	0	5	0	15	10	0	5	9.1667	5	5	5		1	0	0.5	-6	-3	-4.5	7	3	5		-1	3	-4		576		1.70011	0.97802	1.33906	-5.016	-6.14297	-5.57949	6.71611	7.12099	6.91855		-0.70011	-0.97802	-0.83906
	18	7.5	Male	No	61	10	0	10	10	10	10	5	10	10	20	7.5	11.6667	5	10		4	5	4.5	2	-3	-0.5	2	8	5		1	-5	6		543		2.94994	1.99514	2.47254	-3.34876	-4.96034	-4.15455	6.2987	6.95547	6.62709		1.05006	3.00486	2.02746
	19	4.1667	Male	No	68	10	10	5	10	25	5	0	-5	10	0	4.1667	7.5	10	25		3	0	1.5	-1	-7	-4	4	7	5.5		-3	-6	3		0		3.26623	2.20139	2.73381	-3.53298	-5.23144	-4.38221	6.79921	7.43283	7.11602		-0.26623	-2.20139	-1.23381
	20	13.3333	Male	No	61	20	20	10	25	15	10	15	5	15	15	13.3333	14.1667	10	10		2	4	3	0	-2	-1	2	6	4		2	-2	4		9		2.8349	2.00128	2.41809	-2.31975	-3.95647	-3.13811	5.15465	5.95775	5.5562		-0.8349	1.99872	0.58191
	21	5	Male	No	64	5	10	0	10	25	5	5	5	20	25	5	14.1667	5	10		2	2	2	-2	-5	-3.5	4	7	5.5		0	-3	3		6		3.10662	2.0824	2.59451	-3.61672	-5.26091	-4.43881	6.72334	7.34331	7.03333		-1.10662	-0.0824	-0.59451
	22	7.5	Female	No	21	15	5	5	10	5	10	5	5	10	10	7.5	7.5	5	5		1	1	1	-2	-8	-5	3	9	6		0	-6	6		46		1.51822	0.79646	1.15734	-5.65612	-6.68912	-6.17262	7.17433	7.48558	7.32996		-0.51822	0.20354	-0.15734
	23	6.6667	Female	No	32	5	5	5	0	0	10	5	10	0	-5	6.6667	1.6667	5	5		0	0	0	-6	-6	-6	6	6	6		0	0	0		29		1.92838	1.12522	1.5268	-5.16859	-6.35711	-5.76285	7.09697	7.48233	7.28965		-1.92838	-1.12522	-1.5268
	24	7.5	Female	No	24	10	10	5	0	-10	10	10	0	5	-10	7.5	-1.6667	5	5		3	-2	0.5	-4	-7	-5.5	7	5	6		-5	-3	-2		0		1.6256	0.88636	1.25598	-5.48306	-6.55946	-6.02126	7.10866	7.44582	7.27724		1.3744	-2.88636	-0.75598
	25	40.8333	Female	No	75	30	40	45	60	60	35	45	50	65	60	40.8333	56.6667	5	5		3	3	3	4	4	4	-1	-1	-1		0	0	0		3		2.79365	2.44978	2.62172	3.33888	1.38115	2.36002	-0.54522	1.06863	0.2617		0.20635	0.55022	0.37828
	26	19.1667	Female	No	79	20	20	20	15	40	10	15	30	25	55	19.1667	30.8333	10	15		6	5	5.5	5	0	2.5	1	5	3		-1	-5	4		642		3.36413	2.54683	2.95548	-0.25242	-2.17463	-1.21353	3.61655	4.72146	4.169		2.63587	2.45317	2.54452
	27	5.8333	Female	No	28	5	5	10	0	0	5	5	5	-5	-5	5.8333	0.83333	5	5		1	-1	0	-9	-4	-6.5	10	3	6.5		-2	5	-7		0		1.80164	1.00448	1.40306	-5.54634	-6.67341	-6.10987	7.34798	7.67788	7.51293		-0.80164	-2.00448	-1.40306
	28	15	Male	No	22	15	10	10	0	5	15	15	25	15	10	15	10.8333	15	15		2	1	1.5	-3	-4	-3.5	5	5	5		-1	-1	0		0		1.4061	0.83433	1.12021	-4.27542	-5.3552	-4.81531	5.68151	6.18953	5.93552		0.5939	0.16567	0.37979
	29	14.1667	Male	No	61	15	15	25	25	25	5	10	15	15	25	14.1667	21.6667	10	10		1	3	2	0	-5	-2.5	1	8	4.5		2	-5	7		0		2.81846	2.00216	2.41031	-2.17274	-3.81305	-2.99289	4.9912	5.8152	5.4032		-1.81846	0.99784	-0.41031
	30	1.6667	Male	No	25	5	0	-5	5	5	0	5	5	10	-5	1.6667	2.5	10	10		2	-1	0.5	-8	-6	-7	10	5	7.5		-3	2	-5		0		1.77643	0.91019	1.34331	-6.45439	-7.52011	-6.98725	8.23082	8.43029	8.33056		0.22357	-1.91019	-0.84331
	31	10	Male	No	55	10	15	10	5	10	10	10	5	5	5	10	6.6667	5	5		4	2	3	-3	-2	-2.5	7	4	5.5		-2	1	-3		481		2.68588	1.81797	2.25192	-3.25386	-4.78942	-4.02164	5.93974	6.60739	6.27356		1.31412	0.18203	0.74808
	32	19.1667	Male	No	49	20	25	10	10	10	20	20	20	20	0	19.1667	11.6667	10	10		4	-2	1	-3	-3	-3	7	1	4		-6	0	-6		95		2.29034	1.64782	1.96908	-1.98294	-3.47122	-2.72708	4.27327	5.11904	4.69616		1.70966	-3.64782	-0.96908
	33	40	Male	Yes	61	35	45	45	60	60	35	40	40	55	55	40	52.5	5	5		2	2	2	4	0	2	-2	2	0		0	-4	4		0		2.30899	2.02937	2.16918	2.38431	0.63267	1.50849	-0.07532	1.39669	0.66068		-0.30899	-0.02937	-0.16918
	34	20	Male	No	71	25	15	20	30	55	20	20	20	40	75	20	40	5	20		1	3	2	-1	-2	-1.5	2	5	3.5		2	-1	3		6		3.06135	2.30797	2.68466	-0.5669	-2.37698	-1.47194	3.62825	4.68495	4.1566		-2.06135	0.69203	-0.68466
	35	5.8333	Male	No	23	5	5	10	5	15	0	5	10	10	25	5.8333	12.5	5	10		1	0	0.5	-6	-7	-6.5	7	7	7		-1	-1	0		1		1.62267	0.85464	1.23866	-5.83476	-6.8895	-6.36213	7.45743	7.74415	7.60079		-0.62267	-0.85464	-0.73866
	36	8.3333	Male	No	31	0	0	15	10	10	5	15	15	10	20	8.3333	13.3333	15	15		3	3	3	-4	-3	-3.5	7	6	6.5		0	1	-1		168		1.85971	1.09701	1.47836	-4.93228	-6.11352	-5.5229	6.792	7.21053	7.00126		1.14029	1.90299	1.52164
	37	29.1667	Male	No	21	25	30	25	5	20	45	40	10	0	25	29.1667	14.1667	20	20		2	0	1	-1	-3	-2	3	3	3		-2	-2	0		927		1.09092	0.81928	0.9551	-1.83406	-2.96044	-2.39725	2.92498	3.77972	3.35235		0.90908	-0.81928	0.0449
	38	4.1667	Female	No	27	10	5	5	5	0	5	0	0	0	5	4.1667	2.5	5	5		4	-3	0.5	-6	-8	-7	10	5	7.5		-7	-2	-5		467		1.79871	0.97275	1.38573	-5.89801	-7.00344	-6.45072	7.69673	7.97619	7.83646		2.20129	-3.97275	-0.88573
	39	5	Female	No	21	5	5	5	10	15	5	5	5	10	15	5	10	0	0		2	1	1.5	-4	-8	-6	6	9	7.5		-1	-4	3		46		1.56752	0.79383	1.18068	-6.09712	-7.11935	-6.60823	7.66464	7.91318	7.78891		0.43248	0.20617	0.31932
	40	6.6667	Female	No	63	10	5	5	15	15	10	5	5	15	20	6.6667	12.5	0	5		1	3	2	-4	-5	-4.5	5	8	6.5		2	-1	3		21		3.03796	2.05419	2.54608	-3.38039	-5.0173	-4.19885	6.41835	7.07149	6.74492		-2.03796	0.94581	-0.54608
	41	29.1667	Male	No	56	25	25	30	60	65	30	30	35	65	70	29.1667	54.1667	5	5		2	3	2.5	3	-3	0	-1	6	2.5		1	-6	7		324		2.34367	1.86812	2.1059	0.18487	-1.44775	-0.63144	2.1588	3.31588	2.73734		-0.34367	1.13188	0.3941
	42	9.1667	Male	No	48	5	15	10	15	0	0	15	10	10	5	9.1667	8.3333	5	5		4	-2	1	-6	-5	-5.5	10	3	6.5		-6	1	-7		970		2.45176	1.60732	2.02954	-3.80464	-5.23536	-4.52	6.2564	6.84269	6.54954		1.54824	-3.60732	-1.02954
	43	5.8333	Male	No	27	5	5	5	0	5	10	5	5	0	5	5.8333	3.3333	5	5		-1	2	0.5	-7	-7	-7	6	9	7.5		3	0	3		38		1.76585	0.97451	1.37018	-5.60402	-6.71663	-6.16032	7.36987	7.69113	7.5305		-2.76585	1.02549	-0.87018
	44	20.8333	Male	No	49	20	20	25	25	15	20	15	25	25	20	20.8333	22.5	5	5		2	0	1	-3	-4	-3.5	5	4	4.5		-2	-1	-1		963		2.25747	1.64958	1.95352	-1.68894	-3.18441	-2.43668	3.94641	4.83398	4.3902		-0.25747	-1.64958	-0.95352
	45	7.5	Male	No	33	5	0	10	15	0	10	10	10	5	0	7.5	6.6667	10	10		-2	0	-1	-8	-9	-8.5	6	9	7.5		2	-1	3		573		1.94773	1.15607	1.5519	-4.96391	-6.17048	-5.5672	6.91164	7.32655	7.1191		-3.94773	-1.15607	-2.5519
	46	5.8333	Male	No	25	5	5	10	5	0	5	5	5	5	0	5.8333	4.1667	5	5		2	1	1.5	-6	-7	-6.5	8	8	8		-1	-1	0		0		1.69426	0.91458	1.30442	-5.71939	-6.80306	-6.26123	7.41365	7.71764	7.56565		0.30574	0.08542	0.19558
	47	16.6667	Male	No	55	10	10	25	10	10	10	15	30	25	35	16.6667	22.5	5	25		-1	-2	-1.5	-7	-7	-7	6	5	5.5		-1	0	-1		21		2.5544	1.82499	2.18969	-2.07784	-3.64213	-2.85999	4.63224	5.46712	5.04968		-3.5544	-3.82499	-3.68969
	48	5	Male	No	73	10	5	0	35	75	5	0	10	60	75	5	42.5	10	25		4	3	3.5	-6	-2	-4	10	5	7.5		-1	4	-5		275		3.42876	2.3521	2.89043	-3.09756	-4.87193	-3.98475	6.52632	7.22404	6.87518		0.57124	0.6479	0.60957
	49	16.6667	Female	No	67	10	10	25	15	25	15	15	25	20	30	16.6667	23.3333	5	5		7	0	3.5	-2	-2	-2	9	2	5.5		-7	0	-7		847		2.98392	2.18459	2.58425	-1.38563	-3.1235	-2.25457	4.36955	5.30809	4.83882		4.01608	-2.18459	0.91575
	50	4.1667	Male	No	30	5	5	0	10	10	5	0	10	5	10	4.1667	7.5	10	10		3	0	1.5	-7	-7	-7	10	7	8.5		-3	0	-3		10		1.90609	1.06265	1.48437	-5.72496	-6.87378	-6.29937	7.63106	7.93643	7.78374		1.09391	-1.06265	0.01563
	51	8.3333	Male	No	21	5	5	20	10	5	0	5	15	0	5	8.3333	9.1667	5	10		1	3	2	-7	-5	-6	8	8	8		2	2	0		434		1.50178	0.79734	1.14956	-5.50912	-6.54571	-6.02742	7.0109	7.34305	7.17698		-0.50178	2.20266	0.85044
	52	8.3333	Female	No	22	15	10	5	20	20	10	5	5	5	-5	8.3333	8.3333	5	25		0	0	0	-8	-8	-8	8	8	8		0	0	0		649		1.53758	0.82731	1.18244	-5.45144	-6.50249	-5.97696	6.98901	7.3298	7.15941		-1.53758	-0.82731	-1.18244
	53	13.3333	Female	No	33	15	10	15	20	25	15	15	10	15	15	13.3333	16.6667	5	10		-1	2	0.5	-4	-9	-6.5	3	11	7		3	-5	8		496		1.83269	1.16221	1.49745	-3.9349	-5.16661	-4.55076	5.7676	6.32882	6.04821		-2.83269	0.83779	-0.99745
	54	3.3333	Female	No	31	5	0	0	-5	5	0	10	5	0	-5	3.3333	0	10	10		0	1	0.5	-10	-7	-8.5	10	8	9		1	3	-2		894		1.95832	1.09174	1.52503	-5.81429	-6.97398	-6.39414	7.77262	8.06572	7.91917		-1.95832	-0.09174	-1.02503
	55	0.83333	Male	No	31	5	0	5	5	10	0	-5	0	0	5	0.83333	4.1667	5	5		5	2	3.5	-6	-6	-6	11	8	9.5		-3	0	-3		434		2.00763	1.08911	1.54837	-6.25529	-7.40421	-6.82975	8.26292	8.49332	8.37812		2.99237	0.91089	1.95163
	56	2.5	Female	No	51	0	5	5	10	35	-5	5	5	0	40	2.5	15.8333	5	10		0	4	2	-6	-8	-7	6	12	9		4	-2	6		20		2.69062	1.6902	2.19041	-4.80761	-6.25299	-5.5303	7.49823	7.9432	7.72071		-2.69062	2.3098	-0.19041
	57	10	Female	No	60	15	10	10	30	55	10	10	5	25	60	10	30.8333	5	5		3	1	2	-4	-7	-5.5	7	8	7.5		-2	-3	1		426		2.86484	1.9678	2.41632	-2.96544	-4.57332	-3.76938	5.83028	6.54113	6.1857		0.13516	-0.9678	-0.41632
	58	20	Male	No	58	20	25	20	30	50	25	20	10	35	70	20	35.8333	10	20		2	2	2	-4	-4	-4	6	6	6		0	0	0		305		2.59604	1.9184	2.25722	-1.31679	-2.93884	-2.12781	3.91283	4.85724	4.38503		-0.59604	0.0816	-0.25722
	59	5.8333	Female	No	36	5	5	5	5	15	10	5	5	5	15	5.8333	8.3333	5	5		1	-1	0	-10	-8	-9	11	7	9		-2	2	-4		890		2.08798	1.24421	1.6661	-5.08487	-6.32765	-5.70626	7.17285	7.57186	7.37236		-1.08798	-2.24421	-1.6661
	60	10	Female	No	22	10	5	15	5	0	10	10	10	10	10	10	8.3333	5	10		2	4	3	-4	-7	-5.5	6	11	8.5		2	-3	5		6		1.50471	0.82906	1.16689	-5.15743	-6.21566	-5.68655	6.66213	7.04473	6.85343		0.49529	3.17094	1.83311
	61	7.5	Male	No	52	10	5	5	15	30	10	5	10	20	30	7.5	18.3333	5	5		2	4	3	-6	-5	-5.5	8	9	8.5		2	1	1		14		2.6278	1.72543	2.17662	-3.86792	-5.34931	-4.60861	6.49572	7.07475	6.78523		-0.6278	2.27457	0.82338
	62	10.8333	Male	No	27	15	10	5	10	20	10	15	10	10	10	10.8333	10.8333	5	10		3	0	1.5	-7	-7	-7	10	7	8.5		-3	0	-3		287		1.66724	0.97978	1.32351	-4.72201	-5.85616	-5.28909	6.38925	6.83594	6.61259		1.33276	-0.97978	0.17649
	63	7.5	Female	No	66	10	10	0	5	20	10	10	5	10	20	7.5	10	5	5		4	0	2	-5	-8	-6.5	9	8	8.5		-4	-3	-1		365		3.1289	2.14497	2.63694	-3.06034	-4.74424	-3.90229	6.18925	6.88921	6.53923		0.8711	-2.14497	-0.63694
	64	10	Male	No	52	15	5	5	10	10	15	15	5	15	5	10	8.3333	10	10		5	2	3.5	-4	-6	-5	9	8	8.5		-3	-2	-1		738		2.5785	1.72807	2.15328	-3.42691	-4.91908	-4.173	6.00541	6.64715	6.32628		2.4215	0.27193	1.34672
	65	15	Male	No	57	20	10	20	45	20	15	10	15	30	25	15	25.8333	5	15		4	1	2.5	-3	-7	-5	7	8	7.5		-3	-4	1		650		2.65886	1.88317	2.27101	-2.25648	-3.84252	-3.0495	4.91534	5.72569	5.32051		1.34114	-0.88317	0.22899
	66	20	Male	No	62	20	20	10	20	30	20	25	25	40	35	20	26.6667	15	20		1	3	2	-6	-3	-4.5	7	6	6.5		2	3	-1		540		2.73921	2.03827	2.38874	-1.08605	-2.76596	-1.926	3.82526	4.80423	4.31474		-1.73921	0.96173	-0.38874
	67	10.8333	Male	No	46	5	10	20	5	5	5	10	15	15	5	10.8333	10.8333	5	10		0	0	0	-7	-10	-8.5	7	10	8.5		0	-3	3		756		2.34731	1.54914	1.94823	-3.62602	-5.03499	-4.33051	5.97332	6.58414	6.27873		-2.34731	-1.54914	-1.94823
	68	29.1667	Female	Yes	61	25	20	40	50	55	25	25	40	50	60	29.1667	49.1667	5	5		4	1	2.5	-4	-1	-2.5	8	2	5		-3	3	-6		7		2.52264	2.01796	2.2703	0.47329	-1.23166	-0.37918	2.04935	3.24961	2.64948		1.47736	-1.01796	0.2297
	69	5	Female	No	31	5	5	10	15	5	5	0	5	15	5	5	9.1667	5	5		4	2	3	-6	-8	-7	10	10	10		-2	-2	0		0		1.92545	1.0935	1.50948	-5.52028	-6.68715	-6.10372	7.44574	7.78065	7.61319		2.07455	0.9065	1.49052
	70	20.8333	Male	No	65	15	15	20	30	60	20	25	30	50	65	20.8333	42.5	10	20		3	4	3.5	-3	-3	-3	6	7	6.5		1	0	1		252		2.83016	2.12905	2.4796	-0.766	-2.4929	-1.62945	3.59616	4.62194	4.10905		0.16984	1.87095	1.0204
	71	13.3333	Female	No	64	15	20	10	15	20	10	15	10	10	20	13.3333	14.1667	5	5		4	4	4	-2	-6	-4	6	10	8		0	-4	4		501		2.94228	2.09118	2.51673	-2.1467	-3.82681	-2.98676	5.08898	5.91799	5.50348		1.05772	1.90882	1.48327
	72	29.1667	Male	No	71	25	25	35	65	80	20	30	40	60	80	29.1667	60	5	5		0	2	1	-4	-4	-4	4	6	5		2	0	2		16		2.88057	2.31762	2.5991	1.05013	-0.79946	0.12533	1.83044	3.11709	2.47376		-2.88057	-0.31762	-1.5991
	73	30	Male	Yes	63	25	25	35	60	50	25	30	40	55	55	30	49.1667	5	5		5	1	3	1	-5	-2	4	6	5		-4	-6	2		496		2.57779	2.07877	2.32828	0.73566	-1.00181	-0.13308	1.84213	3.08058	2.46136		2.42221	-1.07877	0.67172
	74	15.8333	Female	No	73	15	10	15	45	40	15	20	20	40	30	15.8333	31.6667	10	10		4	4	4	-2	-5	-3.5	6	9	7.5		0	-3	3		658		3.21511	2.36351	2.78931	-1.18654	-3.0076	-2.09707	4.40165	5.37112	4.88638		0.78489	1.63649	1.21069
	75	9.1667	Female	No	61	10	5	10	10	20	10	10	10	20	55	9.1667	20.8333	5	35		2	3	2.5	-8	-5	-6.5	10	8	9		1	3	-2		785		2.91707	1.99689	2.45698	-3.05475	-4.67351	-3.86413	5.97182	6.6704	6.32111		-0.91707	1.00311	0.04302
	76	20	Male	Yes	34	20	20	25	30	10	15	15	25	30	25	20	24.1667	5	15		3	3	3	-5	-4	-4.5	8	7	7.5		0	1	-1		804		1.73701	1.1992	1.4681	-2.7012	-3.9761	-3.33865	4.43821	5.1753	4.80675		1.26299	1.8008	1.5319
	77	10.8333	Female	No	67	10	10	10	20	35	20	10	5	35	15	10.8333	20	10	20		2	4	3	-5	-7	-6	7	11	9		2	-2	4		0		3.09896	2.17845	2.6387	-2.41466	-4.12738	-3.27102	5.51362	6.30583	5.90972		-1.09896	1.82155	0.3613
	78	1.6667	Female	No	24	5	0	-5	5	0	5	5	0	0	-5	1.6667	-0.83333	5	5		4	4	4	-8	-7	-7.5	12	11	11.5		0	1	-1		0		1.74064	0.88022	1.31043	-6.51207	-7.56333	-7.0377	8.25271	8.44355	8.34813		2.25936	3.11978	2.68957
	79	10	Male	No	54	15	10	10	15	10	10	10	5	15	10	10	10.8333	5	5		3	2	2.5	-7	-7	-7	10	9	9.5		-1	0	-1		828		2.65008	1.788	2.21904	-3.31154	-4.83264	-4.07209	5.96163	6.62064	6.29113		0.34992	0.212	0.28096
	80	8.3333	Male	No	51	5	10	15	25	10	5	5	10	10	5	8.3333	12.5	5	15		4	0	2	-7	-10	-8.5	11	10	10.5		-4	-3	-1		0		2.57558	1.69635	2.13596	-3.7786	-5.24913	-4.51387	6.35418	6.94547	6.64983		1.42442	-1.69635	-0.13596
	81	7.5	Female	No	25	10	5	5	0	0	10	5	10	0	0	7.5	2.5	5	5		6	3	4.5	-8	-7	-7.5	14	10	12		-3	1	-4		24		1.66139	0.91633	1.28886	-5.42538	-6.51624	-5.97081	7.08677	7.43257	7.25967		4.33861	2.08367	3.21114
	82	21.6667	Female	No	58	35	10	10	25	20	45	25	5	25	25	21.6667	18.3333	15	15		0	4	2	-6	-8	-7	6	12	9		4	-2	6		10		2.56317	1.92016	2.24166	-1.02278	-2.65201	-1.83739	3.58595	4.57217	4.07906		-2.56317	2.07984	-0.24166
	Number of males		49	5																																										stdev	1.76917	1.8535	1.35521
	Number of hearing aid users
[truncated: 15 more columns]

## Sheet: Data Dictionary
		Variable		Description
		Supplementary Data Set ID		Identification number for supplementary data set unrelated to study codes or other identifiable information for the participant, based on ranking by average SRM Z-Score
		Gender		Gender of the participant
		HA User?		Yes: participant reports using hearing aids; No: No hearing aid use reported
		AgeAudio		Age at which most recent audiometric testing was conducted, in years. May vary from age at test on one or more measures by up to 3 years but is usually within one year.
		R500AC		Detection threshold measured at the right ear with 500 Hz pure tones.
		R1000AC		Detection threshold measured at the right ear with 1000 Hz pure tones.
		R2000AC		Detection threshold measured at the right ear with 2000 Hz pure tones.
		R4000AC		Detection threshold measured at the right ear with 4000 Hz pure tones.
		R8000AC		Detection threshold measured at the right ear with 8000 Hz pure tones.
		L500AC		Detection threshold measured at the left ear with 500 Hz pure tones.
		L1000AC		Detection threshold measured at the left ear with 1000 Hz pure tones.
		L2000AC		Detection threshold measured at the left ear with 2000 Hz pure tones.
		L4000AC		Detection threshold measured at the left ear with 4000 Hz pure tones.
		L8000AC		Detection threshold measured at the left ear with 8000 Hz pure tones.
		PTA_St_B		Average of the standard pure tone audiometric thresholds from the left and right ears measured with pure tones at the following frequencies: 500, 1000, 2000, 4000 Hz.
		PTA_Hf_B		Average of the high frequency pure tone audiometric thresholds from the left and right ears measured with pure tones at the following frequencies: 1000, 2000, 4000, 8000 Hz.
		MaxAsymm_2Kandbelow		Maximum difference in threshold between the left and right ears for frequencies of 500, 1000, or 2000 Hz
		MaxAsymm_allfreqs		Maximum difference in threshold between the left and right ears across all audiometric frequencies
		SR2_0_run1		Average observed threshold for the colocated speech on speech masking condition, based on the first run. Scores can be converted to total correct by adding 10 to the value shown.
		SR2_0_run2		Average observed threshold for the colocated speech on speech masking condition, based on the second run. Scores can be converted to total correct by adding 10 to the value shown.
		SR2_0_runs1_2		Average observed threshold for the colocated speech on speech masking condition, based on the average of two runs. Scores can be converted to total correct by adding 10 to the value shown.
		SR2_45_run1		Average observed threshold for the spatially separated speech on speech masking condition, based on the first run. Scores can be converted to total correct by adding 10 to the value shown.
		SR2_45_run2		Average observed threshold for the spatially separated speech on speech masking condition, based on the second run. Scores can be converted to total correct by adding 10 to the value shown.
		SR2_45_runs1_2		Average observed threshold for the spatially separated speech on speech masking condition, based on the average of two runs. Scores can be converted to total correct by adding 10 to the value shown.
		SR2_SRM_run1		Difference between the average observed thresholds for the colocated and separated speech on speech masking conditions, based on the first run. Also corresponds to the difference in number of correct responses between the two conditions. Positive values indicate more responses, and lower observed thresholds, for the separated conditions.
		SR2_SRM_run2		Difference between the average observed thresholds for the colocated and separated speech on speech masking conditions, based on the second run. Also corresponds to the difference in number of correct responses between the two conditions. Positive values indicate more responses, and lower observed thresholds, for the separated conditions.
		SR2_SRM_runs1_2		Difference between the average observed thresholds for the colocated and separated speech on speech masking conditions, based on the average of two runs. Also corresponds to the difference in number of correct responses between the two conditions. Positive values indicate more responses, and lower observed thresholds, for the separated conditions.
		SR2_0_diff		Difference between the first run and second run estimate of threshold in the colocated condition in dB.
		SR2_45_diff		Difference between the first run and second run estimate of threshold in the separated condition in dB.
		SR2_SRM_diff		Difference between the first run and second run estimate of SRM in dB.
		Difference (Days)		Difference in days between the first and second runs. Both colocated and separated were run on each day.
		SR2_0_run1_pred		Predicted threshold in the colocated condition for the first run, based on the linear regression equation given in the text and the values in Table 3, which is reporoduced with an example in the "Normative Functions Parameters" tab.
		SR2_0_run2_pred		Predicted threshold in the colocated condition for the second run, based on the linear regression equation given in the text and the values in Table 3, which is reporoduced with an example in the "Normative Functions Parameters" tab.
		SR2_0_runs1_2_pred		Predicted threshold in the colocated condition for the average of first and second runs, based on the linear regression equation given in the text and the values in Table 3, which is reporoduced with an example in the "Normative Functions Parameters" tab.
		SR2_45_run1_pred		Predicted threshold in the spatially separated condition for the first run, based on the linear regression equation given in the text and the values in Table 3, which is reporoduced with an example in the "Normative Functions Parameters" tab.
		SR2_45_run2_pred		Predicted threshold in the spatially separated condition for the second run, based on the linear regression equation given in the text and the values in Table 3, which is reporoduced with an example in the "Normative Functions Parameters" tab.
		SR2_45_runs1_2_pred		Predicted threshold in the spatially separated condition for the average of first and second runs, based on the linear regression equation given in the text and the values in Table 3, which is reporoduced with an example in the "Normative Functions Parameters" tab.
		SR2_SRM_run1_pred		Predicted difference in thresholds between the colocated and separated conditions for the first run, based on the linear regression equation given in the text and the values in Table 3.
		SR2_SRM_run2_pred		Predicted difference in thresholds between the colocated and separated conditions for the second run, based on the linear regression equation given in the text and the values in Table 3.
		SR2_SRM_runs1_2_pred		Predicted difference in thresholds between the colocated and separated conditions for the average of the first and second runs, based on the linear regression equation given in the text and the values in Table 3.
		SR2_0_run1_error		Difference between the observed and predicted thresholds in the colocated condition for the first run.
		SR2_0_run2_error		Difference between the observed and predicted thresholds in the colocated condition for the second run.
		SR2_0_runs1_2_error		Difference between the observed and predicted thresholds in the colocated condition for the average of the first and second runs.
		SR2_45_run1_error		Difference between the observed and predicted thresholds in the spatially separated condition for the first run.
		SR2_45_run2_error		Difference between the observed and predicted thresholds in the spatially separated condition for the second run.
		SR2_45_runs1_2_error		Difference between the observed and predicted thresholds in the spatially separated condition for the average of the first and second runs.
		SR2_SRM_run1_error		Difference between the observed and predicted SRM for the first run.
		SR2_SRM_run2_error		Difference between the observed and predicted SRM for the second run.
		SR2_SRM_runs1_2_error		Difference between the observed and predicted SRMfor the average of the first and second runs.
		SR2_0_run1_Zscore		Difference between the observed and predicted thresholds in the colocated condition for the first run divided by the average difference across all participants in that condition.
		SR2_0_run2_Zscore		Difference between the observed and predicted thresholds in the colocated condition for the second run
		SR2_0_runs1_2_Zscore		Difference between the observed and predicted thresholds in the colocated condition for the average of the first and second runs divided by the average difference across all participants in that condition.
		SR2_45_run1_Zscore		Difference between the observed and predicted thresholds in the spatially separated condition for the first run divided by the average difference across all participants in that condition.
		SR2_45_run2_Zscore		Difference between the observed and predicted thresholds in the spatially separated condition for the second run divided by the average difference across all participants in that condition.
		SR2_45_runs1_2_Zscore		Difference between the observed and predicted thresholds in the spatially separated condition for the average of the first and second runs divided by the average difference across all participants in that condition.
		SR2_SRM_run1_Zscore		Difference between the observed and predicted SRM for the first run divided by the average difference across all participants in that condition.
		SR2_SRM_run2_Zscore		Difference between the observed and predicted SRM for the second run divided by the average difference across all participants in that condition.
		SR2_SRM_runs1_2_Zscore		Difference between the observed and predicted SRM for the average of the first and second runs divided by the average difference across all participants in that condition.
				NOTE: For Colocated and Separted Z SCORES, Negative means BETTER than predicted performance. For SRM, Negative means WORSE than predicted performance.

## Sheet: Normative Functions Parameters
	Condition	Run	Adjusted R2	p	Constant	B (Age)	B (PTA)	Model Error (dB)
	Colocated	1	0.071	0.033	0.957	0.035	0	1.76917
		2	0.05	0.07	0.141	0.03	0	1.8535
		Average(1,2)	0.121	0.005	0.549	0.033	0	1.35521
	Separated	1	0.28	0	-8.207	0.058	0.174	3.47364
		2	0.406	0	-9.027	0.047	0.153	2.43309
		Average(1,2)	0.419	0	-8.617	0.053	0.164	2.4799
	SRM	1	0.226	0	9.163	0	-0.188	3.40277
		2	0.241	0	9.168	0	-0.154	2.79187
		Average(1,2)	0.377	0	9.166	0	-0.171	2.25748
	Example Predictions
	Age	PTA
	45	10		Colocated	1	2.532
					2	1.491
					Average(1,2)	2.034
				Separated	1	-3.857
					2	-5.382
					Average(1,2)	-4.592
				SRM	1	7.283
					2	7.628
					Average(1,2)	7.456
